# Supplementary material
Source: HighWire-hosted journal article supplement (https://svn.smart01.highwire.org/content/7/4/319)
Supplement: inline-supplementary-material-1 [file inline-supplementary-material-1.pdf]

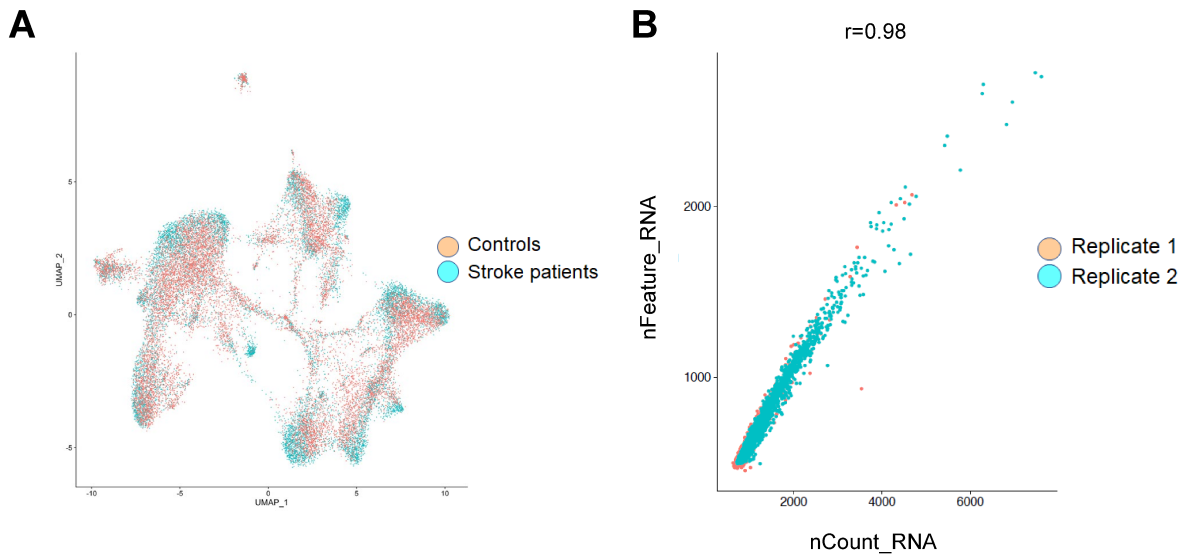

### Supplementary figure 1

A. Distribution of stroke patients (cyan) and controls (pink) in UMAP.

B. Correlation of replicates from the same patient. X-axis (nCount\_RNA) is the UMI (Unique Molecular Identifier) count and Y-axis (nFeature\_RNA) is the number of genes detected in each cell. Cells were colored in pink for biological replicate 1 and cyan for biological replicate 2. Pearson correlation coefficient ( $r=0.98$ ) between the two features was calculated and displayed on top.

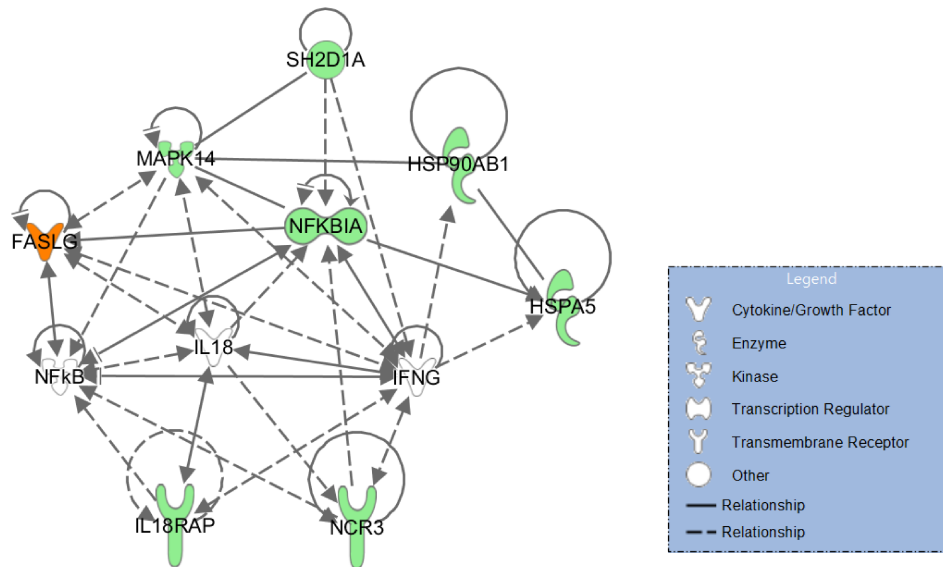

### Supplementary figure 2

A main network in differentially expressed genes of the NK cell cluster.

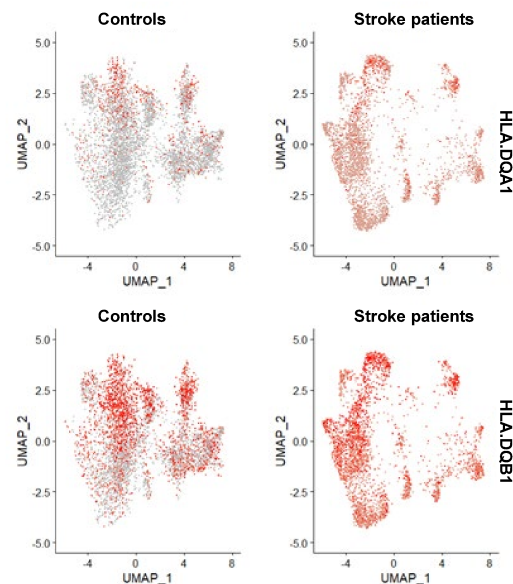

### Supplementary figure 3

Expression of HLA. DQA1 and HLA. DQB1 in CD14+ monocytes of stroke patients and controls.

#### BioPlanet 2019

Bar Graph Table Clustergram

Click the bars to sort. Now sorted by p-value ranking.

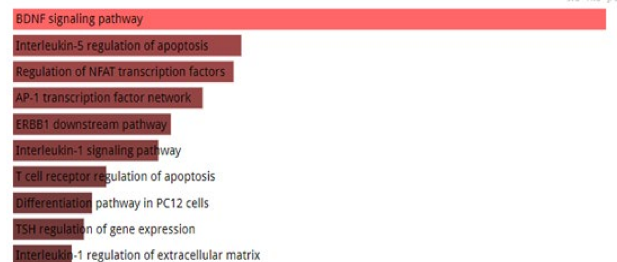

#### WikiPathways 2019 Human

Bar Graph Table Clustergram

Click the bars to sort. Now sorted by p-value ranking.

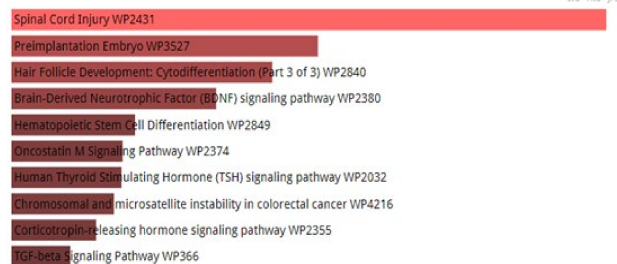

### Supplementary figure 4

Pathway analysis of CD14+ monocyte subcluster #9 .
